# Supplementary material for: Can Habitual Exercise Help Reduce Serum Concentrations of Lipophilic Chemical Mixtures? Association between Physical Activity and Persistent Organic Pollutants
Source: PubMed Central journal article supplement — Diabetes Metab J. 2020 May 11;44(5):764–74. doi: 10.4093/dmj.2019.0158 (PMC7643589; doi:10.4093/dmj.2019.0158), 2020-05-11
Supplement: dmj-2019-0158-s001.pdf [file dmj-2019-0158-s001.pdf]

**Supplementary Table 1.** Wet serum concentrations of persistent organic pollutants according to the duration of leisure-time physical activity

| Variable                | Model <sup>a</sup> | Daily duration of leisure-time moderate to vigorous physical activity, min/day |               |              |               |               | <i>P</i> <sub>trend</sub> | <i>P</i> <sub>quadratic</sub> |
|-------------------------|--------------------|--------------------------------------------------------------------------------|---------------|--------------|---------------|---------------|---------------------------|-------------------------------|
|                         |                    | 0                                                                              | 1 to <10      | 10 to <30    | 30 to <60     | 60≤           |                           |                               |
| No. of subjects         |                    | 750                                                                            | 286           | 328          | 256           | 230           |                           |                               |
| ΣOCPs                   | 1                  | 2,648.8±92.5                                                                   | 2,267.0±124.5 | 1,909.1±97.8 | 2,015.5±116.8 | 1,932.3±118.7 | <0.001                    | 0.012                         |
|                         | 2                  | 2,633.0±94.0                                                                   | 2,290.3±126.5 | 1,912.1±99.1 | 2,012.8±118.7 | 1,938.5±120.4 | <0.001                    | 0.016                         |
| β-Hexachlorocyclohexane | 1                  | 58.3±2.1                                                                       | 46.5±2.7      | 44.2±2.4     | 44.3±2.7      | 42.3±2.7      | <0.001                    | 0.022                         |
|                         | 2                  | 57.9±2.2                                                                       | 46.9±2.7      | 43.8±2.4     | 44.8±2.8      | 42.3±2.8      | <0.001                    | 0.026                         |
| <i>p,p'</i> -DDE        | 1                  | 2,160.6±82.0                                                                   | 1,877.2±112.0 | 1,549.8±86.3 | 1,660.0±104.6 | 1,581.4±105.6 | <0.001                    | 0.023                         |
|                         | 2                  | 2,149.1±83.4                                                                   | 1,896.5±113.9 | 1,552.1±87.5 | 1,653.7±106.1 | 1,584.1±107.0 | <0.001                    | 0.029                         |
| <i>p,p'</i> -DDT        | 1                  | 53.4±1.8                                                                       | 45.4±2.4      | 39.5±2.0     | 40.3±2.3      | 38.8±2.3      | <0.001                    | 0.020                         |
|                         | 2                  | 52.3±1.8                                                                       | 45.4±2.4      | 38.8±2.0     | 39.8±2.3      | 38.2±2.3      | <0.001                    | 0.026                         |
| Oxychlorodane           | 1                  | 59.8±1.5                                                                       | 56.0±2.2      | 53.4±2.0     | 52.6±2.2      | 56.7±2.5      | 0.025                     | 0.028                         |
|                         | 2                  | 60.2±1.6                                                                       | 57.2±2.3      | 54.7±2.1     | 54.3±2.3      | 58.0±2.6      | 0.082                     | 0.056                         |
| <i>Trans</i> -nonachlor | 1                  | 88.8±2.5                                                                       | 86.7±3.8      | 82.8±3.4     | 81.8±3.8      | 85.5±4.2      | 0.159                     | 0.295                         |
|                         | 2                  | 89.8±2.6                                                                       | 88.6±4.0      | 85.0±3.6     | 84.3±4.0      | 87.6±4.4      | 0.302                     | 0.402                         |
| Heptachlor epoxide      | 1                  | 32.7±0.8                                                                       | 31.1±1.2      | 31.0±1.1     | 29.0±1.2      | 26.7±1.2      | <0.001                    | 0.350                         |
|                         | 2                  | 32.5±0.8                                                                       | 31.5±1.2      | 31.1±1.1     | 30.1±1.2      | 26.9±1.2      | <0.001                    | 0.206                         |
| No. of subjects         |                    | 671                                                                            | 252           | 321          | 234           | 224           |                           |                               |
| ΣPCBs                   | 1                  | 559.8±13.4                                                                     | 553.7±20.9    | 579.1±19.4   | 585.1±23.0    | 604.8±24.3    | 0.065                     | 0.663                         |
|                         | 2                  | 563.3±13.8                                                                     | 559.1±21.1    | 588.8±20.1   | 589.8±23.4    | 611.8±25.0    | 0.048                     | 0.768                         |

Values are presented as geometric mean ± standard error (pg/g).

ΣOCPs, sum of six OCPs (β-hexachlorocyclohexane, *p,p'*-DDE, *p,p'*-DDT, oxychlorodane, *trans*-nonachlor, and heptachlor epoxide; ΣPCBs, sum of 12 PCBs (PCB74, PCB99, PCB118, PCB138, PCB146, PCB153, PCB156, PCB170, PCB180, PCB187, 3,3',4,4',5-pentachlorobiphenyl, and 3,3',4,4',5,5'-hexachlorobiphenyl).

<sup>a</sup>Model 1: adjusted for age, sex, and race/ethnicity; Model 2: further adjusted for smoking status, body mass index, weight change for recent 1 year, total calorie intake, dietary intake of total monounsaturated fatty acids, dietary intake of total polyunsaturated fatty acids, and dietary intake of total saturated fatty acids.
