# Supplementary material for: Can Habitual Exercise Help Reduce Serum Concentrations of Lipophilic Chemical Mixtures? Association between Physical Activity and Persistent Organic Pollutants
Source: PubMed Central journal article supplement — Diabetes Metab J. 2020 May 11;44(5):764–74. doi: 10.4093/dmj.2019.0158 (PMC7643589; doi:10.4093/dmj.2019.0158), 2020-05-11
Supplement: dmj-2019-0158-s002.pdf [file dmj-2019-0158-s002.pdf]

**Supplementary Table 2.** Lipid-adjusted serum concentrations of persistent organic pollutants according to the metabolic equivalent (MET)-minutes of leisure-time physical activity

|                         | Model <sup>a</sup> | Daily MET-minutes of leisure-time moderate to vigorous physical activity,<br>MET-min/day |            |            |             |             |            | <i>P</i> <sub>trend</sub> | <i>P</i> <sub>quadratic</sub> |
|-------------------------|--------------------|------------------------------------------------------------------------------------------|------------|------------|-------------|-------------|------------|---------------------------|-------------------------------|
|                         |                    | < 10                                                                                     | 10 to <50  | 50 to <100 | 100 to < 00 | 200 to <500 | 500≤       |                           |                               |
| No. of subjects         |                    | 798                                                                                      | 242        | 171        | 238         | 267         | 134        |                           |                               |
| ΣOCPs                   | 1                  | 427.2±14.1                                                                               | 334.4±19.6 | 337.4±23.4 | 343.7±20.2  | 330.1±18.4  | 354.8±28.2 | <0.001                    | 0.003                         |
|                         | 2                  | 426.0±14.3                                                                               | 338.7±19.8 | 339.3±23.3 | 339.7±20.1  | 327.7±18.3  | 350.9±27.7 | <0.001                    | 0.005                         |
| β-Hexachlorocyclohexane | 1                  | 9.4±0.3                                                                                  | 7.3±0.4    | 7.6±0.5    | 7.8±0.5     | 7.0±0.4     | 7.8±0.6    | <0.001                    | 0.014                         |
|                         | 2                  | 9.3±0.3                                                                                  | 7.3±0.5    | 7.6±0.5    | 7.8±0.5     | 7.0±0.4     | 7.7±0.6    | <0.001                    | 0.018                         |
| <i>p,p'</i> -DDE        | 1                  | 348.9±12.6                                                                               | 273.2±17.5 | 275.4±20.9 | 280.4±18.0  | 272.4±16.5  | 292.2±25.3 | <0.001                    | 0.006                         |
|                         | 2                  | 348.3±12.7                                                                               | 276.8±17.7 | 276.9±20.8 | 276.7±17.9  | 269.8±16.5  | 288.5±24.9 | <0.001                    | 0.008                         |
| <i>p,p'</i> -DDT        | 1                  | 8.6±0.3                                                                                  | 7.0±0.4    | 6.9±0.5    | 6.7±0.4     | 6.9±0.4     | 6.8±0.5    | <0.001                    | 0.012                         |
|                         | 2                  | 8.4±0.3                                                                                  | 7.0±0.4    | 6.8±0.5    | 6.5±0.4     | 6.8±0.4     | 6.6±0.5    | <0.001                    | 0.018                         |
| Oxychlorodane           | 1                  | 9.8±0.2                                                                                  | 8.7±0.4    | 9.0±0.4    | 9.4±0.4     | 8.9±0.4     | 10.0±0.6   | 0.311                     | 0.019                         |
|                         | 2                  | 9.9±0.2                                                                                  | 8.9±0.4    | 9.1±0.5    | 9.6±0.4     | 9.0±0.4     | 10.2±0.6   | 0.456                     | 0.047                         |
| <i>Trans</i> -nonachlor | 1                  | 14.5±0.4                                                                                 | 13.7±0.6   | 13.8±0.8   | 15.3±0.7    | 13.4±0.6    | 14.3±0.9   | 0.571                     | 0.824                         |
|                         | 2                  | 14.7±0.4                                                                                 | 14.1±0.7   | 14.1±0.8   | 15.6±0.7    | 13.7±0.6    | 14.6±0.9   | 0.673                     | 0.963                         |
| Heptachlor epoxide      | 1                  | 5.3±0.1                                                                                  | 5.0±0.2    | 5.2±0.3    | 5.4±0.2     | 4.5±0.2     | 4.8±0.3    | 0.008                     | 0.422                         |
|                         | 2                  | 5.3±0.1                                                                                  | 5.1±0.2    | 5.3±0.3    | 5.4±0.2     | 4.6±0.2     | 4.8±0.3    | 0.021                     | 0.211                         |
| No. of subjects         |                    | 715                                                                                      | 203        | 183        | 207         | 266         | 128        |                           |                               |
| ΣPCBs                   | 1                  | 91.5±2.1                                                                                 | 84.1±3.6   | 97.0±4.4   | 103.6±4.4   | 99.3±3.7    | 103.5±5.6  | <0.001                    | 0.833                         |
|                         | 2                  | 91.9±2.2                                                                                 | 84.6±3.6   | 98.4±4.4   | 104.3±4.4   | 99.0±3.7    | 103.2±5.5  | 0.001                     | 0.972                         |

Values are presented as geometric mean ± standard error (ng/g of lipid).

ΣOCPs, sum of six OCPs (β-hexachlorocyclohexane, *p,p'*-DDE, *p,p'*-DDT, oxychlorodane, *trans*-nonachlor, and heptachlor epoxide; ΣPCBs, sum of 12 PCBs (PCB74, PCB99, PCB118, PCB138, PCB146, PCB153, PCB156, PCB170, PCB180, PCB187, 3,3',4,4',5-pentachlorobiphenyl, and 3,3',4,4',5,5'-hexachlorobiphenyl).

<sup>a</sup>Model 1: adjusted for age, sex, race/ethnicity; Model 2: further adjusted for smoking status, body mass index, weight change for recent 1 year, total calorie intake, dietary intake of total monounsaturated fatty acids, dietary intake of total polyunsaturated fatty acids, and dietary intake of total saturated fatty acids.
